# Supplementary material
Source: Springer Nature journal article supplement (https://www.springermedizin.de/resource/supplementary/12883_2008_191_MOESM1_ESM.pdf/9457040)
Supplement: MOESM1 [file 9457040]

Additional file 1: Included studies

| Lead Author and Year | Condition/ Inclusion criteria                                                                                                | Patient characteristics                                                                           | Number of patients | Dosing regimen                                                                                                                                                                                        | Other analgesic medication                     | Study design        | Duration of active treatment (weeks) | Quality score | OPVS | 50% or more pain relief                                                      | Other pain outcomes (detailed data extracted)                                                               |
|----------------------|------------------------------------------------------------------------------------------------------------------------------|---------------------------------------------------------------------------------------------------|--------------------|-------------------------------------------------------------------------------------------------------------------------------------------------------------------------------------------------------|------------------------------------------------|---------------------|--------------------------------------|---------------|------|------------------------------------------------------------------------------|-------------------------------------------------------------------------------------------------------------|
| Wernicke et al. 2006 | Age ≥18 yrs<br>PDN, without any psychological disorder<br>Daily pain for ≥6 months<br>Baseline pain ≥4 (BPI 11 point Likert) | Mean age 61 (±11) yrs<br>M/F 204/130<br>Duration of neuropathy 4 yrs<br>White 78%<br>Hispanic 16% | 334                | (1) Dulox 60 mg/day.<br>Fixed dose for 12 weeks, then 30 mg for 1 week, n=114<br>(2) Dulox 60 mg x1 daily for 3 days then x2 daily to 12 weeks then x1 daily for 1 week, n=112<br>(3) Placebo, n=108  | Max 4 g paracetamol/day and 325g aspirin/day   | R, DB, PC, parallel | 13                                   | R2, DB1, W1   | 13   | (1) 43% (49/114)<br>(2) 53% (59/112)<br>(3) 27% (29/108)                     | Mean (SE) reduction<br>24hr APS<br>(1) 2.72 (0.22)<br>(2) 2.84 (0.23)<br>(3) 1.39 (0.23)                    |
| Arnold et al. 2004   | Age ≥18 yrs<br>Primary fibromyalgia with or without depression<br>Baseline pain ≥4 (FIQ 11 point scale)                      | Mean age 49 (±12) yrs<br>M/F 23/184<br>White 87%<br>Hispanic 5%<br>Current MDD 38%                | 207                | (1) Dulox 20mg x1 daily for 5 days then 20mg x2 daily ≥3 days, then 40mg x2 daily for ≥2 days then 60mg x2 daily to 12 weeks, n=104<br>(2) Placebo, n=103                                             | Max 2 g paracetamol/day and 325g aspirin/day   | R, DB, PC, parallel | 12                                   | R2, DB2, W1   | 16   | (1) 27.7% (29/104)<br>(2) 16.7% (17/103)                                     | Mean reduction in pain FIQ (fibromyalgia impact questionnaire)<br>(1) 1.98 (0.3)<br>(2) 1.35 (0.29)         |
| Raskin et al. 2005   | Age ≥18yrs<br>PDN, without any psychological disorder<br>Pain present ≥6 months<br>Baseline pain ≥4 (BPI 11 point Likert)    | Mean age 59 (±10) yrs<br>M162/F186<br>Caucasian 99.7%                                             | 348                | (1) Dulox 60 mg x1 daily, n=116<br>(2) Dulox 60mg x1 daily for 3 days then 60mg x2 daily, n=116<br>(3) Placebo, n=116                                                                                 | Max 4 g paracetamol/day and 325g aspirin/day   | R, DB, PC, parallel | 12                                   | R2, DB2, W1   | 16   | (1) 50% (58/116)<br>(2) 39% (45/116)<br>(3) 30% (35/116)                     | Mean reduction (SE)<br>24hr APS<br>(1) 2.50 (0.18)<br>(2) 2.47 (0.18)<br>(3) 1.6 (0.18)                     |
| Goldstein 2005       | Age ≥18yrs<br>PDN, without any psychological disorder<br>Pain present ≥6 months<br>Baseline pain ≥4 (BPI 11 point Likert)    | Mean age 60 (±11) yrs<br>M281/F176<br>Caucasian 77%<br>Hispanic 11%                               | 457                | (1) Dulox 20 mg x1 daily, n=115<br>(2) Dulox 60mg x1 daily, n=114<br>(3) Dulox 40mg x 2daily for 1 week then 60mg x2 daily for 11 weeks, n=113<br>(4) Placebo, n=115                                  | Max 4 g paracetamol/day<br>No other analgesics | R, DB, PC, parallel | 12                                   | R2, DB1, W1   | 13   | (1) 41% (46/115)<br>(2) 49% (55/114)<br>(3) 52% (57/113)<br>(4) 26% (29/115) | Mean reduction (SE)<br>24hr APS<br>(1) 2.36 (0.21)<br>(2) 2.89 (0.22)<br>(3) 3.24 (0.23)<br>(4) 1.91 (0.22) |
| Arnold et al. 2005   | Age ≥18yrs<br>Primary fibromyalgia with or without depression<br>Baseline pain ≥4 (BPI 11 point Likert)                      | Mean age 50 (±11) yrs<br>All F<br>Caucasian 90%<br>Hispanic 8%<br>Current MDD 26%                 | 354                | (1) Dulox 60 mg x1 daily, n=118<br>(2) Dulox 60mg x1 daily for 3 days then 60mg x2 daily, n=116<br>(3) Placebo, n=120                                                                                 | Max 2 g paracetamol/day and 325g aspirin/day   | R, DB, PC, parallel | 12                                   | R1, DB1, W1   | 13   | (1) 41% (48/116)<br>(2) 41% (47/114)<br>(3) 23% (27/118)                     | Mean reduction (SE)<br>24hr APS<br>(1) 2.39 (0.22)<br>(2) 2.40 (0.22)<br>(3) 1.16 (0.21)                    |
| Russell et al. 2008  | Age ≥18yrs<br>ACR defined fibromyalgia with or without depression<br>Baseline pain ≥4 (BPI 11 point Likert)                  | Mean age 51 (±11) yrs<br>M 27/F 493<br>White 84.2%<br>Current MDD 24%                             | 520                | (1) Dulox 20 mg daily, n=115<br>(2) Dulox 30mg daily for 1 week, then 60mg daily, n=114<br>(3) Dulox 30mg daily for 1 week then 60mg daily for 1 week, then 120 mg daily, n=113<br>(4) Placebo, n=115 | Max 2 g paracetamol/day and 325g aspirin/day   | R, DB, parrallel    | 13                                   | R2, DB1, W1   | 13   | (1) 32% (20/79)<br>(2) 34% (51/150)<br>(3) 40% (59/147)<br>(4) 24% (34/144)  | Mean reduction (SE)<br>24hr APS<br>(1) 1.92 (0.27)<br>(2) 1.99 (0.20)<br>(3) 2.31 (0.20)<br>(4) 1.39 (0.20) |

Abbreviations: R=randomised; DB=double blind; W=withdrawals; PC=placebo controlled; BPI=brief pain inventory; AE=adverse event; PDN=painful diabetic neuropathy; Dulox=duloxetine; OPVS=Oxford Pain Validity Score; APS

| Other outcomes                                                                                                                                                                                                             | Ascertainment and reporting of adverse events                                                                                       | Specific adverse events                                                                                                                                                                                                                                                                                                                                                   | Withdrawals- total                                   | Patients with any AE                     | Serious AE                                     | Withdrawals- LoE                                                                                                                   | Withdrawals- AE                                               |
|----------------------------------------------------------------------------------------------------------------------------------------------------------------------------------------------------------------------------|-------------------------------------------------------------------------------------------------------------------------------------|---------------------------------------------------------------------------------------------------------------------------------------------------------------------------------------------------------------------------------------------------------------------------------------------------------------------------------------------------------------------------|------------------------------------------------------|------------------------------------------|------------------------------------------------|------------------------------------------------------------------------------------------------------------------------------------|---------------------------------------------------------------|
| BPI average interference score<br>SF-McGill<br>HAMD total score<br>CGI severity                                                                                                                                            | Adverse events, vital signs and lab tests evaluated<br>Ten most frequent specific adverse events reported                           | Nausea (1)32/114 (2)36/112 (3)7/108<br>Somnolence (1)9/114 (2)17/112 (3)1/108<br>Dizziness (1)18/114 (2)12/112 (3)6/108<br>Headache (1)12/114 (2)15/112 (3)7/108<br>Constipation (1)8/114 (2)21/112 (3)2/108<br>Insomnia, increased sweating, fatigue, nasopharyngitis also increased<br>Changes in lab tests and vital signs were small and not clinically relevant      | (1) 29/114<br>(2) 34/112<br>(3) 23/108               | (1) 102/114<br>(2) 96/112<br>(3) 79/108  | (1) 5/114<br>(2) 2/112<br>(3) 5/108            | (1) 1/114<br>(2) 3/112<br>(3) 5/108                                                                                                | (1) 17/114<br>(2) 20/112<br>(3) 8/108                         |
| BPI average interference score<br>CGI severity<br>PGI-I scale<br>FIQ total score<br>Beck depression inventory<br>Beck anxiety inventory                                                                                    | Adverse events, vital signs and lab tests evaluated                                                                                 | Insomnia, drymouth, constipation more frequent in dulox group than placebo group<br>Changes in lab tests (incl LFT) and vital signs were small and not clinically relevant                                                                                                                                                                                                | (1) 46/104<br>(2) 37/103                             | (1) 94/104<br>(2) 77/103                 | Not reported                                   | (1) 9/104<br>(2) 13/103                                                                                                            | (1) 18/104<br>(2) 11/103                                      |
| BPI average interference score<br>MNSI (michigan neuropathy screening instrument)<br>HAMD total score<br>CGI severity                                                                                                      | Vital signs and lab tests checked, and adverse evnets reviewed, at each visit.                                                      | Nausea,somnolence,hyperhidrosis and anorexia more frequent in dulox groups than placebo group. Vomiting and constipation more frequent in Dulox 60mg than placebo group.<br>Mean increases in lab tests (incl LFT, glucose, cholesterol) and vital signs were small, tansient and not clinically relevant.                                                                | (1) 15/116<br>(2) 21/116<br>(3) 16/116               | (1) 71/116<br>(2) 73/116<br>(3) 57/116   | (1) 4/116<br>(2) 2/116<br>(3) 4/116            | Not reported                                                                                                                       | (1) 5/116<br>(2) 14/116<br>(3) 3/116<br>Most in first 4 weeks |
| BAI total (beck anxiety inventory)<br>Beck depression inventory<br>CGI severity                                                                                                                                            | Spontaneously reported adverse events and vital signs recorded.<br>Specific events reported if significantly different from placebo | Nausea (1)16/115 (2)19/114 (3)31/113 (4)11/115<br>Somnolence (1)9/115 (2)23/114 (3)32/113 (4)9/115<br>Dizziness (1)7/115 (2)11/114 (3)26/113 (4)8/115<br>Constipation (1)6/115 (2)17/114 (3)12/113 (4)4/115<br>Dec appetite (1) 3/115 (2) 3/114 (3) 14/113 (4) 0/115<br>Drymouth, anorexia, weakness also sig different<br>Mean changes in lab tests (incl LFT) and vital | (1) 24/115<br>(2) 28/114<br>(3) 33/113<br>(4) 28/115 | Not reported                             | Total of 19 experienced serious adverse events | (1) 2/115<br>(2) 1/114<br>(3) 2/113<br>(4) 4/115                                                                                   | (1) 5/115<br>(2) 15/114<br>(3) 22/113<br>(4) 7/115            |
| BPI average interference score<br>FIQ total score<br>CGI severity<br>PGI-I<br>HAMD<br>Sheehan Disability Scale<br>Medical Outcomes Study SF-36<br>QoL Depression Scale                                                     | Adverse events, vital signs and lab tests assessed<br>Specific events reported if significantly different from placebo              | Nausea (1)52/118 (2)45/116 (3)16/120<br>Somnolence (1)6/118 (2) 14/116 (3) 5/120<br>Constipation (1)17/118 (2)20/116 (3)4/120<br>Dry mouth (1)25/118 (2)27/116 (3)10/120<br>Dec appetite (1) 6/118 (2) 13/116 (3) 2/120<br>Diarrhoea, anorexia, nasopharyngitis also increased<br>Changes in lab tests and vital signs were small and not clinically relevant             | (1) 41/118<br>(2) 45/116<br>(3) 52/120               | (1) 109/118<br>(2) 105/116<br>(3) 95/120 | (1) 1/118<br>(2) 1/116<br>(3) 0/120            | (1) 7/118<br>(2) 4/116<br>(3) 18/120<br>NB 13 patients in placebo group withdrew consent (vs 1 and 4 in dulox 60 and 120mg groups) | (1) 25/118<br>(2) 27/116<br>(3) 14/120                        |
| PGI-I (patient global impression of improvement)<br>FIQ total score<br>CGI severity<br>Multidimensional Fatigue Inventory<br>HAMD<br>Sheehan Disability Scale<br>Medical Outcomes Study SF-36<br>Euro-QoL Questionnaire-5D | Spontaneously reported adverse events, vital signs and weight recorded.                                                             | No separate data for first 13 weeks                                                                                                                                                                                                                                                                                                                                       | (1) 30/79<br>(2) 53/150<br>(3) 52/147<br>(4) 84/144  | Not reported                             | No separate data for first 13 weeks            | (1) 8/79<br>(2) 11/150<br>(3) 6/147<br>(4) 14/144                                                                                  | (1) 8/79<br>(2) 22/150<br>(3) 32/147<br>(4) 17/144            |

i=average pain score; HAMD=Hamilton depression score; CGI=clinical global impression; PGI-I=patient global improvement; FIQ=fibromyalgia impact questionnaire
